# Supplementary material
Source: Research Square preprint supplement (doi:10.21203/rs.3.rs-9220639/v1)
Supplement: Supplementary file 1 [file Supplementary_Movie.pdf › Supplementary_Movie/Supplementary_Movie.pdf]

**Supplementary Movie 1:** Formation process of fishbone-like branching microscale structures emerging from the bottom of bubbles ( $d = 19.7$  mm and  $22.5$  mm) in the 1.3 wt% HASE solution. The video demonstrates the simultaneous growth of structures from both the left and right sides.

**Supplementary Movie 2:** Formation process of fishbone-like branching microscale structures emerging from the bottom of bubbles ( $d = 19.7$  mm and  $22.5$  mm) in the 1.3 wt% HASE solution. This video highlights the formation of structures originating from a single side.

**Supplementary Movie 3:** Formation of thin filamentary structures emerging from the edge of the elongated trailing tail of a bubble ( $d = 11.5$ ) rising in the 2.1 wt% HASE solution.

**Supplementary Movie 4:** Formation process of complex, jagged branching microscale structures emerging from the bottom of a bubble ( $d = 12.4$  mm) in the 2.1 wt% HASE solution.

**Supplementary Movie 5:** Formation process of extremely elongated trailing tails featuring jagged microscale structures, emerging from the bottom of a bubble ( $d = 14.5$  mm) in the 2.1 wt% HASE solution.

**Supplementary Movie 6:** Magnified view of the formation process of extremely elongated trailing tails featuring jagged microscale structures, originating from the bottom of a bubble ( $d = 14.5$  mm) in the 2.1 wt% HASE solution.
